# Supplementary material
Source: PubMed Central journal article supplement (PMC5556762)
Supplement: JCOPDF-3-668-s001.pdf [file JCOPDF-3-668-s001.pdf]

## **Clinical Practice Guidelines**

### **The Diagnosis and Management of Alpha-1 Antitrypsin Deficiency in the Adult**

*Co-chairs:* Robert A. Sandhaus, MD, PhD<sup>1</sup> and Gerard Turino, MD<sup>2</sup>

*Writing Committee:* Mark L. Brantly, MD,<sup>3</sup> Michael Campos, MD,<sup>4</sup> Carroll E. Cross, MD,<sup>5</sup> Kenneth Goodman, PhD,<sup>6</sup> D. Kyle Hogarth, MD,<sup>7</sup> Shandra L. Knight, MS,<sup>8</sup> James M. Stocks, MD,<sup>9</sup> James K. Stoller, MD, MS,<sup>10</sup> Charlie Strange, MD,<sup>11</sup> Jeffrey Teckman, MD<sup>12</sup>

#### **Online Supplement: Search Strategy and Results Summary**

The following peer-reviewed search strategy (Table I) was used to search MEDLINE with minor revisions for EMBASE, Cochrane Central Registry of Controlled Trials (CCTR) and Database of Abstracts of Reviews of Effects (DARE): (all alpha-1 antitrypsin deficiency OR familial emphysema) OR ((alpha-1 antitrypsin OR drugs) limited to treatment)).

The search for alpha-1 antitrypsin deficiency retrieved 3791 citations less duplicates for January 2002 to December 2014. Three additional hand searched articles were added. Reviewers used EndNote files for the title and abstract review. Full text articles were screened using pre-defined inclusion criteria; 34 were included in the review.

Table 1. Alpha 1-Antitrypsin Deficiency Search Strategy In-Process & Other Non-Indexed Citations, Ovid MEDLINE(R) and Ovid OLDMEDLINE<sup>a</sup>

| #  | Search                                                              |
|----|---------------------------------------------------------------------|
| 1  | Alpha 1-Antitrypsin Deficiency/                                     |
| 2  | ((AAt or A1AT or A1-AT or A1PI or A1P1) adj deficien\$).tw.         |
| 3  | AATD.tw.                                                            |
| 4  | (alpha1 or alpha 1 or alpha one or alfa1 or alfa 1 or alfa one).tw. |
| 5  | (antitrypsin\$ or anti-trypsin\$).tw.                               |
| 6  | (antiproteinase or antiprotease).tw.                                |
| 7  | (proteinase inhibit\$ or protease inhibit\$).tw.                    |
| 8  | 5 or 6 or 7                                                         |
| 9  | deficien\$.tw.                                                      |
| 10 | 4 and 8 and 9                                                       |
| 11 | 2 or 3 or 10                                                        |
| 12 | 1 or 11                                                             |
| 13 | (familial adj emphysema).tw.                                        |
| 14 | pulmonary emphysema/ge                                              |
| 15 | genetic emphysema.tw.                                               |
| 16 | ((inherit\$ or hereditary) adj3 emphysema).tw.                      |
| 17 | or/13-16                                                            |
| 18 | 12 or 17 [all alpha 1-antitrypsin deficiency OR genetic emphysema]  |
| 19 | Alpha 1-Antitrypsin/                                                |
| 20 | (alpha1 or alpha 1 or alpha one or alfa1 or alfa 1 or alfa one).tw. |
| 21 | (antitrypsin\$ or anti-trypsin\$).tw.                               |
| 22 | (antiproteinase or antiprotease).tw.                                |
| 23 | (proteinase inhibit\$ or protease inhibit\$).tw.                    |
| 24 | 21 or 22 or 23                                                      |
| 25 | 20 and 24                                                           |
| 26 | (A1AT or hA1AT or A1-AT or A1PI or A1P1).tw.                        |
| 27 | 19 or 21 or 25 or 26 [all alpha 1-Antitrypsin]                      |
| 28 | Prolastin.mp.                                                       |
| 29 | Aralast.mp.                                                         |
| 30 | Zemaira.mp.                                                         |

|    |                                                                                                                                                                                                                                                                                              |
|----|----------------------------------------------------------------------------------------------------------------------------------------------------------------------------------------------------------------------------------------------------------------------------------------------|
| 31 | 28 or 29 or 30 [alpha 1-antitrypsin drugs]                                                                                                                                                                                                                                                   |
| 32 | 27 or 31 [all alpha 1-Antitrypsin OR drugs]                                                                                                                                                                                                                                                  |
| 33 | limit 18 to english                                                                                                                                                                                                                                                                          |
| 34 | limit 18 to abstracts                                                                                                                                                                                                                                                                        |
| 35 | 33 or 34                                                                                                                                                                                                                                                                                     |
| 36 | limit 35 to human                                                                                                                                                                                                                                                                            |
| 37 | limit 35 to animal                                                                                                                                                                                                                                                                           |
| 38 | 35 not 36 not 37                                                                                                                                                                                                                                                                             |
| 39 | 36 or 38 [all alpha 1-antitrypsin deficiency OR genetic emphysema, limited to English or English abstracts, human or non-indexed]                                                                                                                                                            |
| 40 | limit 32 to english                                                                                                                                                                                                                                                                          |
| 41 | limit 32 to abstracts                                                                                                                                                                                                                                                                        |
| 42 | 40 or 41                                                                                                                                                                                                                                                                                     |
| 43 | limit 42 to human                                                                                                                                                                                                                                                                            |
| 44 | limit 42 to animal                                                                                                                                                                                                                                                                           |
| 45 | 42 not 43 not 44                                                                                                                                                                                                                                                                             |
| 46 | 43 or 45 [all alpha 1-Antitrypsin OR drugs, limited to English or English abstracts, human or non-indexed]                                                                                                                                                                                   |
| 47 | 46 not 39 [alpha 1-Antitrypsin OR drugs, but NOT alpha 1-antitrypsin deficiency, limited to English or English abstracts, human or non-indexed, all years]                                                                                                                                   |
| 48 | clinical trial.pt. or random.mp. or (clinical trial or clinical trials).mp. or (tu or ad or ae).fs. or th.xs. or exp Treatment Outcome/ or (treatments adj2 (effectiv\$ or efficacy)).mp. or exp cohort studies/ or exp case control studies/ or cross-sectional studies/ [treatment filter] |
| 49 | 47 and 48 [alpha 1-Antitrypsin OR drugs, but NOT alpha 1-antitrypsin deficiency, limited to treatment]                                                                                                                                                                                       |
| 50 | 47 not 49 [all alpha 1-Antitrypsin OR drugs that are NOT deficiency, AND NOT treatment, all years]                                                                                                                                                                                           |
| 51 | limit 50 to yr="2002-Current" [all alpha 1-Antitrypsin OR drugs that are NOT deficiency, AND NOT treatment, 2002+]                                                                                                                                                                           |
| 52 | 50 not 51 [all alpha 1-Antitrypsin OR drugs that are NOT deficiency, AND NOT treatment, before 2002]                                                                                                                                                                                         |
| 53 | 39 or 49                                                                                                                                                                                                                                                                                     |
| 54 | limit 53 to yr="2005 -Current"                                                                                                                                                                                                                                                               |

|    |                                                                                                                                   |
|----|-----------------------------------------------------------------------------------------------------------------------------------|
| 55 | alpha 1-Antitrypsin Deficiency/                                                                                                   |
| 56 | ((AAAt or A1AT or A1-AT or A1PI or A1P1) adj deficien\$).tw.                                                                      |
| 57 | AATD.tw.                                                                                                                          |
| 58 | (alpha1 or alpha 1 or alpha one or alfa 1 or alfa 1 or alfa one).tw.                                                              |
| 59 | (antitrypsin\$ or anti-trypsin\$).tw.                                                                                             |
| 61 | (proteinase inhibit\$ or protease inhibit\$).tw.                                                                                  |
| 63 | deficien\$.tw.                                                                                                                    |
| 65 | 56 or 57 or 64                                                                                                                    |
| 67 | (familial adj emphysema).tw.                                                                                                      |
| 69 | genetic emphysema.tw.                                                                                                             |
| 71 | or/67-70                                                                                                                          |
| 73 | alpha 1-Antitrypsin/                                                                                                              |
| 75 | (antitrypsin\$ or anti-trypsin\$).tw.                                                                                             |
| 77 | (proteinase inhibit\$ or protease inhibit\$).tw.                                                                                  |
| 79 | 74 and 78                                                                                                                         |
| 81 | 73 or 75 or 79 or 80 [all alpha 1-Antitrypsin]                                                                                    |
| 83 | Aralast.mp.                                                                                                                       |
| 84 | Zemaira.mp.                                                                                                                       |
| 85 | 82 or 83 or 84 [alpha 1-antitrypsin drugs]                                                                                        |
| 86 | 81 or 85 [all alpha 1-Antitrypsin OR drugs]                                                                                       |
| 87 | limit 72 to english                                                                                                               |
| 88 | limit 72 to abstracts                                                                                                             |
| 89 | 87 or 88                                                                                                                          |
| 90 | limit 89 to human                                                                                                                 |
| 91 | limit 89 to animal                                                                                                                |
| 92 | 89 not 90 not 91                                                                                                                  |
| 93 | 90 or 92 [all alpha 1-antitrypsin deficiency OR genetic emphysema, limited to English or English abstracts, human or non-indexed] |

<sup>a</sup>Adapted for Embase, Cochrane Central Register of Controlled Trials (CCTR), Database of Abstracts of Reviews of Effects (DARE), and Cochrane Database of Systematic Reviews (CDSR) in Ovid.

**Online Supplement: Supplemental Bibliography**

**Detection and Diagnosis**

1. Holme J, Stockley JA, Stockley RA. Age related development of respiratory abnormalities in non-index alpha-1 antitrypsin deficient studies. *Respir Med.* 2013;107(3):387-393. doi: <http://www.ncbi.nlm.nih.gov/pubmed/23276486>
2. Ferrarotti I, Thun GA, Zorzetto M, et al. Serum levels and genotype distribution of alpha1-antitrypsin in the general population. *Thorax.* 2012;67(8):669-674. doi:<http://www.ncbi.nlm.nih.gov/pubmed/22426792>
3. Hogarth DK. Alpha one antitrypsin genotypes in an asthma referral clinic. *Ann Allergy Asthma Immunol.* 2012;109:A23. doi: <http://www.ncbi.nlm.nih.gov/pubmed/70922512>
4. Rahaghi FF, Sandhaus RA, Brantly ML, et al. The prevalence of alpha-1 antitrypsin deficiency among patients found to have airflow obstruction. *COPD.* 2012;9(4):352-358. doi: <http://www.ncbi.nlm.nih.gov/pubmed/22506682>
5. Thun GA, Ferrarotti I, Imboden M, et al. SERPINA1 PiZ and PiS heterozygotes and lung function decline in the SAPALDIA cohort. *PLoS One.* 2012;7(8):e42728. doi: <http://www.ncbi.nlm.nih.gov/pubmed/22912729>
6. Coors ME, Moseley R, McGorray S. Informed consent process in Alpha-1 testing of at-risk children: views of parents and adults tested as children. *COPD.* 2011;8(1):30-38. doi: <http://www.ncbi.nlm.nih.gov/pubmed/21299476>
7. Campos MA, Alazemi S, Zhang G, et al. Clinical characteristics of subjects with symptoms of alpha1-antitrypsin deficiency older than 60 years. *Chest.* 2009;135(3):600-608. doi: <http://www.ncbi.nlm.nih.gov/pubmed/19017884>
8. Coors ME, Levinson AH, Huitt GA. Anxiety related to genetic testing for alpha-1 antitrypsin deficiency and cystic fibrosis in COPD and/or bronchiectasis patients. *Community Genet.* 2008;11(3):135-140. doi: <http://www.ncbi.nlm.nih.gov/pubmed/18376109>
9. Bals R, Koczulla R, Kotke V, Andress J, Blackert K, Vogelmeier C. Identification of individuals with alpha-1-antitrypsin deficiency by a targeted screening program. *Respir Med.* 2007;101(8):1708-1714. doi: <http://www.ncbi.nlm.nih.gov/pubmed/17428650>
10. Carpenter MJ, Strange C, Jones Y, et al. Does genetic testing result in behavioral health change? Changes in smoking behavior following testing for alpha-1 antitrypsin deficiency. *Ann Behav Med.* 2007;33(1):22-28. doi: <http://www.ncbi.nlm.nih.gov/pubmed/17291167>
11. Eden E, Holbrook JT, Brantly ML, Turino GM, Wise RA. Prevalence of alpha-1 antitrypsin deficiency in poorly controlled asthma—results from the ALA-ACRC low-dose theophylline trial. *J Asthma.* 2007;44(8):605-608. doi: <http://www.ncbi.nlm.nih.gov/pubmed/17943569>
12. Ferrarotti I, Scabini R, Campo I, et al. Laboratory diagnosis of alpha1-antitrypsin deficiency. *Transl Res.* 2007;150(5):267-274. doi: <http://www.ncbi.nlm.nih.gov/pubmed/17964515>

13. Holme J, Stockley RA. Radiologic and clinical features of COPD patients with discordant pulmonary physiology: lessons from alpha1-antitrypsin deficiency. *Chest*. 2007;132(3):909-915. doi: <http://www.ncbi.nlm.nih.gov/pubmed/17573491>
14. Strange C, Moseley MA, Jones Y, Schwarz L, Xie L, Brantly ML. Genetic testing of minors for alpha1-antitrypsin deficiency. *Arch Pediatr Adolesc Med*. 2006;160(5):531-534. doi: <http://www.ncbi.nlm.nih.gov/pubmed/16651497>
15. Strange C, Stoller JK, Sandhaus RA, Dickson R, Turino G. Results of a survey of patients with alpha-1 antitrypsin deficiency. *Respiration*. 2006;73(2):185-190. doi: <http://www.ncbi.nlm.nih.gov/pubmed/16141711>
16. Campos MA, Wanner A, Zhang G, Sandhaus RA. Trends in the diagnosis of symptomatic patients with alpha1-antitrypsin deficiency between 1968 and 2003. *Chest*. 2005;128(3):1179-1186. doi: <http://www.ncbi.nlm.nih.gov/pubmed/16162704>
17. Stoller JK, Sandhaus RA, Turino G, Dickson R, Rodgers K, Strange C. Delay in diagnosis of alpha1-antitrypsin deficiency: a continuing problem. *Chest*. 2005;128(4):1989-1994. doi: <http://www.ncbi.nlm.nih.gov/pubmed/16236846>
18. Blanco I, Fernandez-Bustillo E, de Serres FJ, Alkassam D, Rodriguez Menendez C. PI\*S and PI\*Z alpha 1-antitrypsin deficiency: estimated prevalence and number of deficient subjects in Spain. *Med Clin (Barc)*. 2004;123(20):761-765. doi:<http://www.ncbi.nlm.nih.gov/pubmed/15607066>
19. Chappell S, Guetta-Baranes T, Batowski K, et al. Haplotypes of the alpha-1 antitrypsin gene in healthy controls and Z deficiency patients. *Hum Mutat*. 2004;24(6):535-536. doi: <http://www.ncbi.nlm.nih.gov/pubmed/15532029>
20. Cox DW. Prenatal diagnosis for alpha1-antitrypsin deficiency. *Prenat Diagn*. 2004;24(6):468-470. doi: <http://www.ncbi.nlm.nih.gov/pubmed/15229848>
21. Kwok JSY, Lawton JWM, Yew WW, Chau CH, Lee J, Wong PC. Protease inhibitor phenotypes and serum alpha-1-antitrypsin levels in patients with COPD: a study from Hong Kong. *Respirology*. 2004;9(2):265-270. doi: <http://www.ncbi.nlm.nih.gov/pubmed/15182280>
22. Luisetti M, Seersholm N. Alpha1-antitrypsin deficiency. 1: epidemiology of alpha1-antitrypsin deficiency. *Thorax*. 2004;59(2):164-169. doi: <http://www.ncbi.nlm.nih.gov/pubmed/14760160>
23. Sibtain NA, Padley SPG. HRCT in small and large airways diseases. *Eur Radiol Suppl*. 2004;14 (4):L31-L43.

24. Wadsworth MEJ, Vinall LE, Jones AL, et al. Alpha1-antitrypsin as a risk for infant and adult respiratory outcomes in a national birth cohort. *Am J Respir Cell Mol Biol.* 2004;31(5):559-564. doi: <http://www.ncbi.nlm.nih.gov/pubmed/15271689>
25. Silva GE, Sherrill DL, Guerra S, Barbee RA. A longitudinal study of alpha1-antitrypsin phenotypes and decline in FEV1 in a community population. *Chest.* 2003;123(5):1435-1440. doi: <http://www.ncbi.nlm.nih.gov/pubmed/12740258>
26. Rodriguez F, Jardi R, Costa X, et al. Rapid screening for alpha1-antitrypsin deficiency in patients with chronic obstructive pulmonary disease using dried blood specimens. *Am J Respir Crit Care Med.* 2002;166(6):814-817. doi: <http://www.ncbi.nlm.nih.gov/pubmed/12231490>
27. Seersholm N. Epidemiology of emphysema in subjects with severe alpha 1-antitrypsin deficiency. *Dan Med Bull.* 2002;49(2):145-158. doi: <http://www.ncbi.nlm.nih.gov/pubmed/12064091>

#### **Clinical Evaluation of Individuals with AATD**

1. Subramanian DR, Edgar R, Ward H, Parr DG, Stockley RA. Prevalence and radiological outcomes of lung nodules in alpha 1-antitrypsin deficiency. *Respir Med.* 2013;107(6):863-869. doi: <http://www.ncbi.nlm.nih.gov/pubmed/23337299>
2. Bernspang E, Diaz S, Stoel B, Wollmer P, Sveger T, Piitulainen E. CT lung densitometry in young adults with alpha-1-antitrypsin deficiency. *Respir Med.* 2011;105(1):74-79. doi: <http://www.ncbi.nlm.nih.gov/pubmed/20674322>
3. Dye DE, Brameld KJ, Maxwell S, Goldblatt J, O'Leary P. The impact of single gene and chromosomal disorders on hospital admissions in an adult population. *J Community Genet.* 2011;2(2):81-90. doi: <http://www.ncbi.nlm.nih.gov/pubmed/22109792>
4. McGee D, Strange C, McClure R, Schwarz L, Erven M. The Alpha-1 Association Genetic Counseling Program: an innovative approach to service. *J Genet Couns.* 2011;20(4):330-336. doi: <http://www.ncbi.nlm.nih.gov/pubmed/21424325>
5. Ottaviani S, Gorrini M, Scabini R, et al. C reactive protein and alpha1-antitrypsin: relationship between levels and gene variants. *Transl Res.* 2011;157(6):332-338. doi: <http://www.ncbi.nlm.nih.gov/pubmed/21575917>
6. Shin S-Y, Choi GS, Lee KH, et al. Changes of Alpha1-Antitrypsin Levels in Allergen-induced Nasal Inflammation. *Clin Exp Otorhinolaryngol.* 2011;4(1):33-39. doi: <http://www.ncbi.nlm.nih.gov/pubmed/21461061>



7. Topic A, Prokic D, Stankovic I. Alpha-1-antitrypsin deficiency in early childhood. *Fetal Pediat Pathol.* 2011;30(5):312-319. doi: <http://www.ncbi.nlm.nih.gov/pubmed/21609162>
8. Zutler M, Quinlan PJ, Blanc PD. Alpha-1-antitrypsin deficient man presenting with lung function decline associated with dust exposure: a case report. *J Med Case Reports.* 2011;5:154. doi: <http://www.ncbi.nlm.nih.gov/pubmed/21504560>
9. Alam S, Li Z, Mahadeva R. Cigarette smoke induced oxidation of a-1 antitrypsin amplifies the pulmonary inflammatory response. *Thorax.* 2010;65:A29.
10. Banauch GI, Brantly M, Izbicki G, et al. Accelerated spirometric decline in New York City firefighters with alpha1-antitrypsin deficiency. *Chest.* 2010;138(5):1116-1124. doi: <http://www.ncbi.nlm.nih.gov/pubmed/20634282>
11. Duckers JM, Shale DJ, Stockley RA, et al. Cardiovascular and musculoskeletal co-morbidities in patients with alpha 1 antitrypsin deficiency. *Respir Res.* 2010;11:173. doi: <http://www.ncbi.nlm.nih.gov/pubmed/21138571>
12. Eden E. Asthma and COPD in alpha-1 antitrypsin deficiency. Evidence for the Dutch hypothesis. *COPD.* 2010;7(5):366-374. doi: <http://www.ncbi.nlm.nih.gov/pubmed/20854052>
13. Gama MPR, Jonasson TH, Gama JD, et al. Extreme insulin-resistance syndrome associated with alpha-1 antitrypsin deficiency. *Endocrinologist.* 2010;20 (3):137-140.
14. Klitzman RL. Misunderstandings concerning genetics among patients confronting genetic disease. *J Genet Couns.* 2010;19(5):430-446. doi: <http://www.ncbi.nlm.nih.gov/pubmed/20512408>
15. Tanash HA, Nilsson PM, Nilsson J-A, Piitulainen E. Survival in severe alpha-1-antitrypsin deficiency (PiZZ). *Respir Res.* 2010;11:44. doi: <http://www.ncbi.nlm.nih.gov/pubmed/20420704>
16. Ward H, Miller MR, Stockley RA. Changes in physiological phenotypes of a-1-antitrypsin deficiency with time. *Thorax.* 2010; 65:A30-A31.
17. Bernspang E, Wollmer P, Sveger T, Piitulainen E. Lung function in 30-year-old alpha-1-antitrypsin-deficient individuals. *Respir Med.* 2009;103(6):861-865. doi: <http://www.ncbi.nlm.nih.gov/pubmed/19181511>
18. Campos MA, Alazemi S, Zhang G, Wanner A, Sandhaus RA. Effects of a disease management program in individuals with alpha-1 antitrypsin deficiency. *COPD.* 2009;6(1):31-40. doi: <http://www.ncbi.nlm.nih.gov/pubmed/19229706>
19. Dawkins P, Wood A, Nightingale P, Stockley R. Mortality in alpha-1-antitrypsin deficiency in the United Kingdom. *Respir Med.* 2009;103(10):1540-1547. doi: <http://www.ncbi.nlm.nih.gov/pubmed/19443188>

20. Dawkins PA, Dawkins CL, Wood AM, Nightingale PG, Stockley JA, Stockley RA. Rate of progression of lung function impairment in alpha1-antitrypsin deficiency. *Eur Respir J*. 2009;33(6):1338-1344. doi: <http://www.ncbi.nlm.nih.gov/pubmed/19164359>
21. Han MK, Bartholmai B, Liu LX, et al. Clinical significance of radiologic characterizations in COPD. *COPD*. 2009;6(6):459-467. <http://www.ncbi.nlm.nih.gov/pubmed/19938970>
22. Iwanicka-Michalowicz M, Grzelewska-Rzymowska I. Risk factors of chronic obstructive pulmonary disease in hospitalised patients. [Polish]. *Pediatrics i Medycyna Rodzinna*. 2009;5(1):27-32.
23. Kalsheker NA. alpha1-Antitrypsin deficiency: best clinical practice. *J Clin Pathol*. 2009;62(10):865-869. doi: <http://www.ncbi.nlm.nih.gov/pubmed/19783716>
24. Kemp SV, Polkey MI, Shah PL. The epidemiology, etiology, clinical features, and natural history of emphysema. *Thorac Surg Clin*. 2009;19(2):149-158. <http://www.ncbi.nlm.nih.gov/pubmed/19662957>
25. Segelmark M, Mohammad A. *Apmis*. 2009;Conference: 14<sup>th</sup> International Vasculitis and ANCA Workshop Lund Sweden. Conference Start: 20090606 Conference End: 20090609. Conference Publication: (var.pagings). 117:163.
26. Soriano JB, Miravittles M. Your racing horses will help you to quit: a lesson for COPD and alpha1-antitrypsin deficiency research. *Eur Respir J*. 2009;33(6):1244-1246. doi: <http://www.ncbi.nlm.nih.gov/pubmed/19483042>
27. Stavngaard T, Sogaard LV, Batz M, Schreiber LM, Dirksen A. Progression of emphysema evaluated by MRI using hyperpolarized (3)He (HP (3)He) measurements in patients with alpha-1-antitrypsin (A1AT) deficiency compared with CT and lung function tests. *Acta Radiol*. 2009;50(9):1019-1026. doi: <http://www.ncbi.nlm.nih.gov/pubmed/19863412>
28. Stoller JK, Aboussouan LS. Myths and misconceptions about alpha1antitrypsin deficiency. *Arch Intern Med*. 2009;169(6):546-550. doi: <http://www.ncbi.nlm.nih.gov/pubmed/19307516>
29. van Beek EJR, Dahmen AM, Stavngaard T, et al. Hyperpolarised 3He MRI versus HRCT in COPD and normal volunteers: PHIL trial. *Eur Respir J*. 2009;34(6):1311-1321. doi: <http://www.ncbi.nlm.nih.gov/pubmed/19541712>
30. Wanner A. COPD: new lessons from alpha1-antitrypsin deficiency? *Chest*. 2009;135(5):1342-1344. doi: <http://www.ncbi.nlm.nih.gov/pubmed/19420201>
31. Wood AM, Harrison RM, Semple S, Ayres JG, Stockley RA. Outdoor air pollution is associated with disease severity in alpha1-antitrypsin deficiency. *Eur Respir J*. 2009;34(2):346-353. doi: <http://www.ncbi.nlm.nih.gov/pubmed/19324958>

32. Yamashiro T, Matsuoka S, Estepar RSJ, et al. Quantitative airway assessment on computed tomography in patients with alpha1-antitrypsin deficiency. *COPD*. 2009;6(6):468-477. doi: <http://www.ncbi.nlm.nih.gov/pubmed/19938971>
33. Abboud RT, Vimalanathan S. Pathogenesis of COPD. Part I. The role of protease-antiprotease imbalance in emphysema. *Int J Tuberc Lung Dis*. 2008;12(4):361-367. doi: <http://www.ncbi.nlm.nih.gov/pubmed/18371259>
34. Bakker ME, Putter H, Stolk J, et al. Assessment of regional progression of pulmonary emphysema with CT densitometry. *Chest*. 2008;134(5):931-937. doi: <http://www.ncbi.nlm.nih.gov/pubmed/18625668>
35. Bilton D. Update on non-cystic fibrosis bronchiectasis. *Curr Opin Pulm Med*. 2008;14(6):595-599. doi: <http://www.ncbi.nlm.nih.gov/pubmed/18812838>
36. Carter R, Tjep BL. Patients with alpha-1 antitrypsin deficiency: Disease management considerations. *Disease Management and Health Outcomes*. 2008;16 (5):345-351.
37. Fregonese L, Stolk J, Frants RR, Veldhuisen B. Alpha-1 antitrypsin Null mutations and severity of emphysema. *Respir Med*. 2008;102(6):876-884. doi: <http://www.ncbi.nlm.nih.gov/pubmed/18353624>
38. Lazarus A, Myers J, Fuhrer G. Bronchiectasis in adults: a review. *Postgrad Med*. 2008;120(3):113-121. doi: <http://www.ncbi.nlm.nih.gov/pubmed/18824830>
39. Moller W, Meyer G, Kreyling WG. Advances in lung imaging techniques for the treatment of respiratory disease. *Drug Discov Today Ther Strateg*. 2008;5 (2):87-92.
40. Parr DG, Sevenoaks M, Deng C, Stoel BC, Stockley RA. Detection of emphysema progression in alpha 1-antitrypsin deficiency using CT densitometry; methodological advances. *Respir Res*. 2008;9:21. doi: <http://www.ncbi.nlm.nih.gov/pubmed/18271964>
41. Petty TL, Mannino DM. Will recommendations against spirometry make chronic obstructive pulmonary disease harder to treat? *Ann Intern Med*. 2008;149(7):512-513; author reply 513. doi: <http://www.ncbi.nlm.nih.gov/pubmed/18838733>
42. Quast TM, Self AR, Browning RF. Diagnostic Evaluation of Bronchiectasis. *Dis Mon*. 2008;54 (8):527-539. doi: <http://www.ncbi.nlm.nih.gov/pubmed/18638621>
43. Rodriguez E, Ferrer J, Marti S, Zock JP, Plana E, Morell F. Impact of occupational exposure on severity of COPD. *Chest*. 2008;134(6):1237-1243. doi: <http://www.ncbi.nlm.nih.gov/pubmed/18689596>
44. Silva GE, Guerra S, Keim S, Barbee RA, Sherrill DL. Longitudinal decline of diffusing capacity of the lung for carbon monoxide in community subjects with the PiMZ alpha1-

antitrypsin phenotype. *Chest*. 2008;133(5):1095-1100. doi:  
<http://www.ncbi.nlm.nih.gov/pubmed/18263681>

45. Tanash HA, Nilsson PM, Nilsson JA, Piitulainen E. Clinical course and prognosis of never-smokers with severe alpha-1-antitrypsin deficiency (PiZZ). *Thorax*. 2008;63(12):1091-1095. doi: <http://www.ncbi.nlm.nih.gov/pubmed/18682522>
46. Yang P, Sun Z, Krowka MJ, et al. Alpha1-antitrypsin deficiency carriers, tobacco smoke, chronic obstructive pulmonary disease, and lung cancer risk. *Arch Intern Med*. 2008;168(10):1097-1103. doi: <http://www.ncbi.nlm.nih.gov/pubmed/18504338>
47. Chan ED, Kaminska AM, Gill W, et al. Alpha-1-antitrypsin (AAT) anomalies are associated with lung disease due to rapidly growing mycobacteria and AAT inhibits Mycobacterium abscessus infection of macrophages. *Scand J Infect Dis*. 2007;39(8):690-696. doi: <http://www.ncbi.nlm.nih.gov/pubmed/17654345>
48. Gupta N, Kabra M. Recent advances in approach to treatment of genetic disorders: Clinician's perspective. *Indian Pediatr*. 2007;44 (5):361-369. doi: <http://www.ncbi.nlm.nih.gov/pubmed/17536138>
49. Hersh CP, Jacobson FL, Gill R, Silverman EK. Computed tomography phenotypes in severe, early-onset chronic obstructive pulmonary disease. *COPD*. 2007;4(4):331-337. doi: <http://www.ncbi.nlm.nih.gov/pubmed/18027160>
50. Kim W-D, Ling SH, Coxson HO, et al. The association between small airway obstruction and emphysema phenotypes in COPD. *Chest*. 2007;131(5):1372-1378. doi: <http://www.ncbi.nlm.nih.gov/pubmed/17317735>
51. Makita H, Nasuhara Y, Nagai K, et al. Characterisation of phenotypes based on severity of emphysema in chronic obstructive pulmonary disease. *Thorax*. 2007;62(11):932-937. doi: <http://www.ncbi.nlm.nih.gov/pubmed/17573447>
52. Meinke L, Chitkara R, Krishna G. Advances in the management of chronic obstructive pulmonary disease. *Expert Opin Pharmacother*. 2007;8(1):23-37. doi: <http://www.ncbi.nlm.nih.gov/pubmed/17163804>
53. Lomas DA. The selective advantage of alpha1-antitrypsin deficiency. *Am J Respir Crit Care Med*. 2006;173(10):1072-1077. doi: <http://www.ncbi.nlm.nih.gov/pubmed/16439713>
54. Mahr AD, Neogi T, Merkel PA. Epidemiology of Wegener's granulomatosis: Lessons from descriptive studies and analyses of genetic and environmental risk determinants. *Clin Exp Rheumatol*. 2006;24(2 Suppl 41):S82-91. doi: <http://www.ncbi.nlm.nih.gov/pubmed/16859601>

55. Mayer AS, Stoller JK, Vedal S, et al. Risk factors for symptom onset in PI\*Z alpha-1 antitrypsin deficiency. *Int J Chron Obstruct Pulmon Dis*. 2006;1(4):485-492. doi: <http://www.ncbi.nlm.nih.gov/pubmed/18044105>
56. O'Connor TP, Crystal RG. Genetic medicines: treatment strategies for hereditary disorders. *Nat Rev Genet*. 2006;7(4):261-276. doi: <http://www.ncbi.nlm.nih.gov/pubmed/16543931>
57. Parr DG, Dawkins PA, Stockley RA. Computed tomography: A new gold standard for the clinical assessment of emphysema. *Am J Respir Crit Care Med*. 2006;174 (8):954. doi: <http://www.ncbi.nlm.nih.gov/pubmed/17021361>
58. Wise RA. The value of forced expiratory volume in 1 second decline in the assessment of chronic obstructive pulmonary disease progression. *Am J Med*. 2006;119(10 Suppl 1):4-11. doi: <http://www.ncbi.nlm.nih.gov/pubmed/16996894>
59. McMahon MA, O'Mahony MJ, O'Neill SJ, McElvaney NG, Logan PM. Alpha-1 antitrypsin deficiency and computed tomography findings. *J Comput Assist Tomogr*. 2005;29(4):549-553. doi: <http://www.ncbi.nlm.nih.gov/pubmed/16012317>
60. Senn O, Russi EW, Imboden M, Probst-Hensch NM. alpha1-Antitrypsin deficiency and lung disease: risk modification by occupational and environmental inhalants. *Eur Respir J*. 2005;26(5):909-917. doi: <http://www.ncbi.nlm.nih.gov/pubmed/16264055>
61. Sheel AW, Road JD. Effects of physical activity on exercise capacity in twins with alpha-1 antitrypsin deficiency. *Clin J Sport Med*. 2005;15(3):183-185. doi: <http://www.ncbi.nlm.nih.gov/pubmed/15867564>
62. Stoller JK, Tomashefski J, Jr., Crystal RG, et al. Mortality in individuals with severe deficiency of alpha1-antitrypsin: findings from the National Heart, Lung, and Blood Institute Registry. *Chest*. 2005;127(4):1196-1204. doi: <http://www.ncbi.nlm.nih.gov/pubmed/15821195>
63. Yang P, Bamlet WR, Sun Z, et al. Alpha1-antitrypsin and neutrophil elastase imbalance and lung cancer risk.[Erratum appears in *Chest*. 2006 Jan;129(1):216 Note: Krowka, Michael J [added]]. *Chest*. 2005;128(1):445-452. doi: <http://www.ncbi.nlm.nih.gov/pubmed/16002971>
64. Shaker SB, Stavngaard T, Stolk J, Stoel B, Dirksen A. Alpha1-antitrypsin deficiency. 7: Computed tomographic imaging in alpha1-antitrypsin deficiency. *Thorax*. 2004;59(11):986-991. doi: <http://www.ncbi.nlm.nih.gov/pubmed/15516477>
65. Wewers MD. Alpha1-antitrypsin deficiency: more than a protease imbalance? *Chest*. 2004;125(5):1607-1609. doi: <http://www.ncbi.nlm.nih.gov/pubmed/15136365>
66. American Thoracic Society/European Respiratory Society statement: standards for the diagnosis and management of individuals with alpha-1 antitrypsin deficiency. *Am J Respir Crit Care Med*. 2003;168(7):818-900. doi: <http://www.ncbi.nlm.nih.gov/pubmed/14522813>

67. Corbo GM, Forastiere F, Agabiti N, et al. Passive smoking and lung function in alpha(1)-antitrypsin heterozygote schoolchildren. *Thorax*. 2003;58(3):237-241. doi: <http://www.ncbi.nlm.nih.gov/pubmed/12612303>
68. Dawkins PA, Dowson LJ, Guest PJ, Stockley RA. Predictors of mortality in alpha1-antitrypsin deficiency. *Thorax*. 2003;58(12):1020-1026. doi: <http://www.ncbi.nlm.nih.gov/pubmed/14645964>
69. Malerba M, Radaeli A, Ceriani L, Tantucci C, Grassi V. Airway hyperresponsiveness in a large group of subjects with alpha1-antitrypsin deficiency: a cross-sectional controlled study. *J Intern Med*. 2003;253(3):351-358. doi: <http://www.ncbi.nlm.nih.gov/pubmed/12603503>
70. Stolk J, Ng WH, Bakker ME, et al. Correlation between annual change in health status and computer tomography derived lung density in subjects with alpha1-antitrypsin deficiency.[Erratum appears in *Thorax*. 2004 Feb;59(2):179]. *Thorax*. 2003;58(12):1027-1030. doi: <http://www.ncbi.nlm.nih.gov/pubmed/14645966>
71. Takii Y, Inoue H, Karashima E, et al. Systemic vasculitis associated with alpha1-antitrypsin deficiency. *Intern Med*. 2003;42(7):619-623. doi: <http://www.ncbi.nlm.nih.gov/pubmed/12879958>
72. Dowson LJ, Guest PJ, Stockley RA. The relationship of chronic sputum expectoration to physiologic, radiologic, and health status characteristics in alpha(1)-antitrypsin deficiency (PiZ). *Chest*. 2002;122(4):1247-1255. doi: <http://www.ncbi.nlm.nih.gov/pubmed/12377849>
73. Miravittles M, Vila S, Torrella M, et al. Influence of deficient alpha1-anti-trypsin phenotypes on clinical characteristics and severity of asthma in adults. *Respir Med*. 2002;96(3):186-192. doi: <http://www.ncbi.nlm.nih.gov/pubmed/11905553>
74. Piitulainen E, Sveger T. Respiratory symptoms and lung function in young adults with severe alpha(1)-antitrypsin deficiency (PiZZ). *Thorax*. 2002;57(8):705-708. doi: <http://www.ncbi.nlm.nih.gov/pubmed/12149531>
75. Siafakas NM, Tzortzaki EG. Few smokers develop COPD. Why? *Respir Med*. 2002;96(8):615-624. doi: <http://www.ncbi.nlm.nih.gov/pubmed/12195843>

### **Non-specific Treatment of AATD Lung Disease**

1. Tuohy MM, Remund KF, Hilfiker R, Murphy DT, Murray JG, Egan JJ. Endobronchial valve deployment in severe alpha-1 antitrypsin deficiency emphysema: a case series. *Clin Respir J*. 2013;7(1):45-52. doi: <http://www.ncbi.nlm.nih.gov/pubmed/22236390>

2. Alam S, Li Z, Janciauskiene S, Mahadeva R. Oxidation of Z alpha1-antitrypsin by cigarette smoke induces polymerization: a novel mechanism of early-onset emphysema. *Am J Respir Cell Mol Biol*. 2011;45(2):261-269. doi:<http://www.ncbi.nlm.nih.gov/pubmed/20971880>
3. El Fakir S, Nejjar C, Serhier Z, et al. Alpha 1 antitrypsin phenotypes and obstructive airway disease in subjects over 65 years of age: QUID R cohort. *Age Ageing*. 2011;40(5):627-629. doi: <http://www.ncbi.nlm.nih.gov/pubmed/21791445>
4. Karaaslan C, Hirakawa H, Yasumatsu R, et al. Elastase inhibitory activity of airway alpha1-antitrypsin is protected by treatment with a catalytic antioxidant in a baboon model of severe bronchopulmonary dysplasia. *Pediatr Res*. 2011;70(4):363-367. doi: <http://www.ncbi.nlm.nih.gov/pubmed/21705962>
5. Alam S, Li Z, Janciauskiene S, Mahadeva R. Cigarette smoke promotes polymerisation of Z alpha 1-antitrypsin. *Thorax*. 2010;65:A29-A30.
6. Sorheim I-C, Bakke P, Gulsvik A, et al. alpha1-Antitrypsin protease inhibitor MZ heterozygosity is associated with airflow obstruction in two large cohorts. *Chest*. 2010;138(5):1125-1132. doi: <http://www.ncbi.nlm.nih.gov/pubmed/20595457>
7. Stolk J, Cooper BG, Stoel B, et al. Retinoid treatment of Emphysema in Patients on the Alpha-1 International Registry. The REPAIR study: study design, methodology and quality control of study assessments. *Therap*. 2010;4(6):319-332. doi: <http://www.ncbi.nlm.nih.gov/pubmed/20926506>
8. Jain AB, Patel V, Apostolakos M, Sheikh B, Kashyap R, Orloff M. Effect of liver transplant on pulmonary functions in adult patients with Alpha 1 Antitrypsin (A1A) deficiency. *Liver Transpl*. 2009;15:S153-S154.
9. van der Meer RM, Wagena E, Ostelo RWJG, Jacobs AJE, van Schayck O. Smoking cessation for chronic obstructive pulmonary disease. *Cochrane Database Syst Rev*. 2009(1). doi: <http://www.ncbi.nlm.nih.gov/pubmed/12804448>
10. Corda L, Bertella E, La Piana GE, Boni E, Redolfi S, Tantucci C. Inhaled corticosteroids as additional treatment in alpha-1-antitrypsin-deficiency-related COPD. *Respiration*. 2008;76(1):61-68. doi: <http://www.ncbi.nlm.nih.gov/pubmed/18319586>
11. Mora JI, Hadjiliadis D. Lung volume reduction surgery and lung transplantation in chronic obstructive pulmonary disease. *Int J Chron Obstruct Pulmon Dis*. 2008;3(4):629-635. doi: <http://www.ncbi.nlm.nih.gov/pubmed/19281079>
12. Moreno P, Alvarez A, Algar FJ, et al. Incidence, management and clinical outcomes of patients with airway complications following lung transplantation. *Eur J Cardiothorac Surg*. 2008;34(6):1198-1205. doi: <http://www.ncbi.nlm.nih.gov/pubmed/18824370>

13. Boswell-Smith V, Spina D. PDE4 inhibitors as potential therapeutic agents in the treatment of COPD-focus on roflumilast. *Int J Chron Obstruct Pulmon Dis*. 2007;2(2):121-129. doi: <http://www.ncbi.nlm.nih.gov/pubmed/18044684>
14. Burton CM, Carlsen J, Mortensen J, Andersen CB, Milman N, Iversen M. Long-term Survival After Lung Transplantation Depends on Development and Severity of Bronchiolitis Obliterans Syndrome. *J Heart Lung Transplant*. 2007;26 (7):681-686. doi: <http://www.ncbi.nlm.nih.gov/pubmed/17613397>
15. Stoller JK, Gildea TR, Ries AL, Meli YM, Karafa MT. Lung Volume Reduction Surgery in Patients With Emphysema and alpha-1 Antitrypsin Deficiency. *Ann Thorac Surg*. 2007;83 (1):241-251. doi: <http://www.ncbi.nlm.nih.gov/pubmed/17184672>
16. Dauriat G, Mal H, Jebrak G, et al. Functional results of unilateral lung volume reduction surgery in alpha1-antitrypsin deficient patients. *Int J Chron Obstruct Pulmon Dis*. 2006;1(2):201-206. doi: <http://www.ncbi.nlm.nih.gov/pubmed/18046897>
17. Stavem K, Bjortuft O, Borgan O, Geiran O, Boe J. Lung transplantation in patients with chronic obstructive pulmonary disease in a national cohort is without obvious survival benefit. *J Heart Lung Transplant*. 2006;25(1):75-84. doi: <http://www.ncbi.nlm.nih.gov/pubmed/16399534>
18. Mal H, Guignabert C, Thabut G, et al. Recurrence of pulmonary emphysema in an alpha-1 proteinase inhibitor-deficient lung transplant recipient. *Am J Respir Crit Care Med*. 2004;170(7):811-814. doi: <http://www.ncbi.nlm.nih.gov/pubmed/15184198>
19. Tutic M, Bloch KE, Lardinois D, Brack T, Russi EW, Weder W. Long-term results after lung volume reduction surgery in patients with alpha1-antitrypsin deficiency. *J Thorac Cardiovasc Surg*. 2004;128(3):408-413. doi: <http://www.ncbi.nlm.nih.gov/pubmed/15354100>
20. Cassivi SD, Meyers BF, Battafarano RJ, et al. Thirteen-year experience in lung transplantation for emphysema. *Ann Thorac Surg*. 2002;74(5):1663-1669; discussion 1669-1670. doi: <http://www.ncbi.nlm.nih.gov/pubmed/12440627>

### **Liver Disease in AATD**

1. Dawwas MF, Davies SE, Griffiths WJ, Lomas DA, Alexander GJ. Prevalence and risk factors for liver involvement in individuals with PiZZ-related lung disease. *Am J Respir Crit Care Med*. 2013;187(5):502-508. doi: <http://www.ncbi.nlm.nih.gov/pubmed/23262512>
2. Goltz D, Vossing LM, Kirfel J, Spengler U, Fischer HP. alpha1-antitrypsin PiMZ-mutation and alcoholic steatohepatitis are BI-directionally aggravating amplifiers in chronic liver disease. *J Hepatol*. 2013;58:S559.



3. Gorska K, Korczynski P, Struniawski R, et al. Heterozygous alpha1-antitrypsin deficiency in liver transplant candidates. *Pol Arch Med Wewn.* 2013;123(1-2):14-20. doi: <http://www.ncbi.nlm.nih.gov/pubmed/23235492>
4. Bugeja T, Gelson W, Massood A, Maguire G, Davies SE, Griffiths WJH. A high prevalence of heterozygous alpha-1 antitrypsin deficiency in patients with advanced parenchymal liver disease. *J Hepatol.* 2012;56:S227.
5. Nelson DR, Teckman J, Di Bisceglie AM, Brenner DA. Diagnosis and management of patients with alpha1-antitrypsin (A1AT) deficiency. *Clin Gastroenterol Hepatol.* 2012;10(6):575-580. doi: <http://www.ncbi.nlm.nih.gov/pubmed/22200689>
6. Barnes TC, Cross A, Anderson ME, Edwards SW, Moots RJ. Relative alpha1-antitrypsin deficiency in systemic sclerosis. *Rheumatology (Oxford).* 2011;50(8):1373-1378. doi: <http://www.ncbi.nlm.nih.gov/pubmed/21454304>
7. Ding J, Yannam GR, Roy-Chowdhury N, et al. Spontaneous hepatic repopulation in transgenic mice expressing mutant human alpha1-antitrypsin by wild-type donor hepatocytes. *J Clin Invest.* 2011;121(5):1930-1934. doi: <http://www.ncbi.nlm.nih.gov/pubmed/21505264>
8. Fox M, Fox J, Davies M. Diagnosis and management of chronic liver disease in older people. *Rev Clin Gerontol.* 2011;21(1):1-15.
9. Ezzikouri S, El Feydi AE, El Kihal L, et al. Prevalence of common HFE and SERPINA1 mutations in patients with hepatocellular carcinoma in a Moroccan population. *Arch Med Res.* 2008;39(2):236-241. doi: <http://www.ncbi.nlm.nih.gov/pubmed/18164971>
10. Stoller JK, Piliang M. Panniculitis in alpha-1 antitrypsin deficiency: A review. *Clin Pulm Med.* 2008;15 (2):113-117.
11. Regev A, Guaqueta C, Molina EG, et al. Does the heterozygous state of alpha-1 antitrypsin deficiency have a role in chronic liver diseases? Interim results of a large case-control study. *J Pediatr Gastroenterol Nutr.* 2006;43 Suppl 1:S30-35. doi: <http://www.ncbi.nlm.nih.gov/pubmed/16819398>
12. Scott BB, Egner W. Does alpha1-antitrypsin phenotype PiMZ increase the risk of fibrosis in liver disease due to hepatitis C virus infection? *Eur J Gastroenterol Hepatol.* 2006;18(5):521-523. doi: <http://www.ncbi.nlm.nih.gov/pubmed/16607148>
13. Bowlus CL, Willner I, Zern MA, et al. Factors associated with advanced liver disease in adults with alpha1-antitrypsin deficiency. *Clin Gastroenterol Hepatol.* 2005;3(4):390-396. doi: <http://www.ncbi.nlm.nih.gov/pubmed/15822045>
14. Hadzic N, Francavilla R, Chambers SM, Castellaneta S, Portmann B, Mieli-Vergani G. Outcome of PiSS and PiSZ alpha-1-antitrypsin deficiency presenting with liver involvement. *Eur J Pediatr.* 2005;164(4):250-252. doi: <http://www.ncbi.nlm.nih.gov/pubmed/15711957>

15. Kim JS, Tanaka N, Newell JD, et al. Nontuberculous mycobacterial infection: CT scan findings, genotype, and treatment responsiveness. *Chest*. 2005;128(6):3863-3869. doi: <http://www.ncbi.nlm.nih.gov/pubmed/16354855>
16. Rudnick DA, Perlmutter DH. Alpha-1-antitrypsin deficiency: a new paradigm for hepatocellular carcinoma in genetic liver disease. *Hepatology*. 2005;42(3):514-521. <http://www.ncbi.nlm.nih.gov/pubmed/16044402>
17. Montalto G, Cervello M, Giannitrapani L, Dantona F, Terranova A, Castagnetta LAM. Epidemiology, risk factors, and natural history of hepatocellular carcinoma. *Ann N Y Acad Sci*. 2002;963:13-20. doi: <http://www.ncbi.nlm.nih.gov/pubmed/12095924>
18. Pittschieler K. Liver involvement in alpha1-antitrypsin-deficient phenotypes PiSZ and PiMZ. *Acta Paediatr*. 2002;91(2):239-240. doi: <http://www.ncbi.nlm.nih.gov/pubmed/11952016>

### **Specific Treatment of AATD COPD**

1. Campos M, Brantly M, Chen J, et al. Safety and tolerability of 120 mg/kg dose of alpha1-proteinase inhibitor in alpha-1 antitrypsin deficiency: A multicenter, randomized, double-blind, crossover study. *Chest*. 2012;142:742A. doi: <http://www.ncbi.nlm.nih.gov/pubmed/71073079>
2. Frenzel E, Aggarwal N, Wrenger S, Welte T, Janciauskiene S. Elastase inhibition is not a requirement for the anti-inflammatory effects of Alpha-1 Antitrypsin: Studies in neutrophil models. *Pneumologie*. 2012;66 (6).
3. Schmid ST, Koepke J, Dresel M, et al. The effects of weekly augmentation therapy in patients with PiZZ alpha1-antitrypsin deficiency. *Int J Chron Obstruct Pulmon Dis*. 2012;7:687-696. doi: <http://www.ncbi.nlm.nih.gov/pubmed/23055718>
4. Gotzsche PC, Johansen HK. Intravenous alpha-1 antitrypsin augmentation therapy for treating patients with alpha-1 antitrypsin deficiency and lung disease. *Cochrane Database Syst Rev*. 2010(7):CD007851. doi: <http://www.ncbi.nlm.nih.gov/pubmed/20614465>
5. McCarthy C, Dimitrov BD. Augmentation therapy for alpha-1 antitrypsin deficiency—not enough evidence to support its use yet! *COPD*. 2010;7(3):234; author reply 235-236. doi: <http://www.ncbi.nlm.nih.gov/pubmed/20486824>
6. Stockley RA, Parr DG, Piitulainen E, Stolk J, Stoel BC, Dirksen A. Therapeutic efficacy of alpha-1 antitrypsin augmentation therapy on the loss of lung tissue: an integrated analysis of 2 randomised clinical trials using computed tomography densitometry. *Respir Res*. 2010;11:136. doi: <http://www.ncbi.nlm.nih.gov/pubmed/20920370>

7. Stocks JM, Brantly ML, Wang-Smith L, et al. Pharmacokinetic comparability of Prolastin®-C to Prolastin® in alpha(1)-antitrypsin deficiency: a randomized study. *BMC Clin Pharmacol*. 2010;10:13. doi: <http://www.ncbi.nlm.nih.gov/pubmed/20920295>
8. Stocks JM, Brantly ML, Wang-Smith L, et al. Pharmacokinetic comparability of Prolastin-C to Prolastin in alpha1-antitrypsin deficiency: A randomized study. *BMC Clin Pharml*. 2010;10(13). doi: <http://www.ncbi.nlm.nih.gov/pubmed/20920295>
9. Chapman KR, Stockley RA, Dawkins C, Wilkes MM, Navickis RJ. Augmentation therapy for alpha1 antitrypsin deficiency: a meta-analysis. *COPD*. 2009;6(3):177-184. doi: <http://www.ncbi.nlm.nih.gov/pubmed/19811373>
10. Dirksen A, Piitulainen E, Parr DG, et al. Exploring the role of CT densitometry: a randomised study of augmentation therapy in alpha1-antitrypsin deficiency. *Eur Respir J*. 2009;33(6):1345-1353. doi: <http://www.ncbi.nlm.nih.gov/pubmed/19196813>
11. Parr DG, Dirksen A, Piitulainen E, Deng C, Wencker M, Stockley RA. Exploring the optimum approach to the use of CT densitometry in a randomised placebo-controlled study of augmentation therapy in alpha 1-antitrypsin deficiency. *Respir Res*. 2009;10:75. doi: <http://www.ncbi.nlm.nih.gov/pubmed/19678952>
12. Stoller JK, Fallat R, Schluchter MD, et al. Augmentation therapy with alpha1-antitrypsin: patterns of use and adverse events. 2003. *Chest*. 2009;136(5 Suppl):e30. doi: <http://www.ncbi.nlm.nih.gov/pubmed/20162784>
13. Tonelli AR, Rouhani F, Li N, Schreck P, Brantly ML. Alpha-1-antitrypsin augmentation therapy in deficient individuals enrolled in the Alpha-1 Foundation DNA and Tissue Bank. *Int J Chron Obstruct Pulmon Dis*. 2009;4:443-452. doi: <http://www.ncbi.nlm.nih.gov/pubmed/20054436>
14. Blanco I, Canto H, Flores J, et al. Long-term augmentation therapy with alpha-1 antitrypsin in an MZ-AAT severe persistent asthma. *Monaldi Arch Chest Dis*. 2008;69(4):178-182. doi: <http://www.ncbi.nlm.nih.gov/pubmed/19350840>
15. Heresi GA, Stoller JK. Augmentation therapy in alpha-1 antitrypsin deficiency. *Expert Opin Biol Ther*. 2008;8(4):515-526. doi: <http://www.ncbi.nlm.nih.gov/pubmed/18352854>
16. Sandhaus RA, Turino G, Stocks J, et al. alpha1-Antitrypsin augmentation therapy for PI\*MZ heterozygotes: a cautionary note. *Chest*. 2008;134(4):831-834. doi: <http://www.ncbi.nlm.nih.gov/pubmed/18842915>
17. Sandstrom CS, Piitulainen E, Janciauskiene S. Augmentation therapy in emphysema patient with ZZ alpha-1-antitrypsin deficiency. *Respir Med CME*. 2008;1 (2):153-157.
18. Zamora NP, Pla RV, Del Rio PG, Margaleff RJ, Frias FR, Ronsano JBM. Intravenous human plasma-derived augmentation therapy in alpha 1-antitrypsin deficiency: from

pharmacokinetic analysis to individualizing therapy.[Erratum appears in *Ann Pharmacother.* 2008 Jun;42(6):905 Note: Ronsano, Jose Bruno Montoro (corrected Ronsano, Jose Bruno Montoro)]. *Ann Pharmacother.* 2008;42(5):640-646. doi: <http://www.ncbi.nlm.nih.gov/pubmed/18413692>

19. Bernspang E, Sveger T, Piitulainen E. Respiratory symptoms and lung function in 30-year-old individuals with alpha-1-antitrypsin deficiency. *Respir Med.* 2007;101(9):1971-1976. doi: <http://www.ncbi.nlm.nih.gov/pubmed/17532199>
20. Dirksen A, Stockley RA, Piitulainen E, Shaker SB, Bernhardt T. A randomized, placebo-controlled, double-blind, exploratory study of the effect of augmentation therapy in patients with severe alpha-1 antitrypsin deficiency (AATD) and chronic obstructive pulmonary disease (COPD) [Abstract]. *American Thoracic Society International Conference, May.* 2007.
21. Stocks JM, Brantly M. Biochemical efficacy and tolerability of a new augmentation preparation in two patients with MmaltonZ Alpha1-Antitrypsin deficiency [Abstract]. *J Allergy Clin Immunol.* 2007;119(1 Suppl):S301 [1178].
22. Dirksen A BT. The EXACTLIE trial a validation of computed tomography to show effects of treatment in alpha-1-antitrypsin (AAT) deficiency [Abstract]. *Eur Respir J.* 2006;28(Suppl 50):334s [2008].
23. Stocks JM, Brantly M, Pollock D, et al. Multi-center study: the biochemical efficacy, safety and tolerability of a new alpha1-proteinase inhibitor, Zemaira. *COPD.* 2006;3(1):17-23. doi: <http://www.ncbi.nlm.nih.gov/pubmed/17175661>
24. Gildea TR, Shermock KM, Singer ME, Stoller JK. Cost-effectiveness analysis of augmentation therapy for severe alpha1-antitrypsin deficiency. *Am J Respir Crit Care Med.* 2003;167(10):1387-1392. doi: <http://www.ncbi.nlm.nih.gov/pubmed/12574076>
25. Mullins CD, Wang J, Stoller JK. Major components of the direct medical costs of alpha1-antitrypsin deficiency. *Chest.* 2003;124(3):826-831. doi: <http://www.ncbi.nlm.nih.gov/pubmed/12970004>
26. Piitulainen E, Bernspang E, Bjorkman S, Berntorp E. Tailored pharmacokinetic dosing allows self-administration and reduces the cost of IV augmentation therapy with human alpha(1)-antitrypsin. *Eur J Clin Pharmacol.* 2003;59(2):151-156. doi: <http://www.ncbi.nlm.nih.gov/pubmed/12728289>
27. Stoller JK, Fallat R, Schluchter MD, et al. Augmentation therapy with alpha1-antitrypsin: patterns of use and adverse events. *Chest.* 2003;123(5):1425-1434. doi: <http://www.ncbi.nlm.nih.gov/pubmed/12740257>
28. Brantly M. Alpha1-antitrypsin: not just an antiprotease: extending the half-life of a natural anti-inflammatory molecule by conjugation with polyethylene glycol. *Am J Respir Cell Mol Biol.* 2002;27(6):652-654. doi: <http://www.ncbi.nlm.nih.gov/pubmed/12444023>

29. Mullins CD, Blatt L, Wang J. Societal implications of the pharmacoeconomics of alpha1-antitrypsin deficiency. *Expert rev.* 2002;2(3):243-249. doi: <http://www.ncbi.nlm.nih.gov/pubmed/19807416>
30. Stockley RA, Bayley DL, Unsal I, Dowson LJ. The effect of augmentation therapy on bronchial inflammation in alpha1-antitrypsin deficiency. *Am J Respir Crit Care Med.* 2002;165(11):1494-1498. doi: <http://www.ncbi.nlm.nih.gov/pubmed/12045122>
31. Stoller JK, Rouhani F, Brantly M, et al. Biochemical efficacy and safety of a new pooled human plasma alpha(1)-antitrypsin, Respitin. *Chest.* 2002;122(1):66-74. doi: <http://www.ncbi.nlm.nih.gov/pubmed/12114340>

### **Additional References**

1. Bradi AC, Audisho N, Casey DK, Chapman KR. Alpha-1 antitrypsin deficiency in Canada: regional disparities in diagnosis and management. *COPD.* 2015;12 Suppl 1:15-21. doi: <http://www.ncbi.nlm.nih.gov/pubmed/25938286>
2. Chapman KR, Burdon JG, Piitulainen E, et al. Intravenous augmentation treatment and lung density in severe alpha1 antitrypsin deficiency (RAPID): a randomised, double-blind, placebo-controlled trial. *Lancet.* 2015;386(9991):360-368. doi: <http://www.ncbi.nlm.nih.gov/pubmed/26026936>
3. Mehta M, Chapman KR, Heffer M, Marras TK. Impact of pulmonary nontuberculous mycobacterial treatment on pulmonary function tests in patients with and without established obstructive lung disease. *Respirology.* 2015;20(6):987-993. doi: <http://www.ncbi.nlm.nih.gov/pubmed/26011313>
4. Schuh C, Fritscher LG, Chapman KR, Fritscher CC. The prevalence of asthma and atopy in schoolchildren from Porto Alegre, Brazil, has plateaued. *Respir Med.* 2015;109(3):308-311. doi: <http://www.ncbi.nlm.nih.gov/pubmed/25683031>
5. Tan WC, Sin DD, Bourbeau J, et al. Characteristics of COPD in never-smokers and ever-smokers in the general population: results from the CanCOLD study. *Thorax.* 2015;70(9):822-829. doi: <http://www.ncbi.nlm.nih.gov/pubmed/26048404>
6. Molloy K, Hersh CP, Morris VB, et al. Clarification of the risk of chronic obstructive pulmonary disease in alpha1-antitrypsin deficiency PiMZ heterozygotes. *Am J Respir Crit Care Med.* 2014;189(4):419-427. doi: <http://www.ncbi.nlm.nih.gov/pubmed/24428606>
7. Teckman J, Pardee E, Howell RR, et al. Appropriateness of Newborn Screening for alpha1-Antitrypsin Deficiency. *J Pediatr Gastroenterol Nutr.* 2014;58(2):201-205. doi: <http://www.ncbi.nlm.nih.gov/pubmed/24121147>

8. Teckman JH, Jain A. Advances in alpha-1-antitrypsin deficiency liver disease. *Curr Gastroenterol Rep*. 2014;16(1):367. doi: <http://www.ncbi.nlm.nih.gov/pubmed/24338605>
9. Lewis EC. Expanding the clinical indications for alpha1-antitrypsin therapy. *Mol Med*. 2012;18(6):957-970. doi: <http://www.ncbi.nlm.nih.gov/pubmed/22634722>
10. Ekeowa UI, Gooptu B, Belorgey D, et al. alpha1-Antitrypsin deficiency, chronic obstructive pulmonary disease and the serpinopathies. *Clin Sci (Colch)*. 2009;116(12):837-850. doi: <http://www.ncbi.nlm.nih.gov/pubmed/19426146>
11. Greene CM, Miller SDW, Carroll T, et al. Alpha-1 antitrypsin deficiency: a conformational disease associated with lung and liver manifestations. *J Inherit Metab Dis*. 2008;31(1):21-34. <http://www.ncbi.nlm.nih.gov/pubmed/18193338>
12. Belorgey D, Hagglof P, Karlsson-Li S, Lomas DA. Protein misfolding and the serpinopathies. *Prion*. 2007;1(1):15-20. doi: <http://www.ncbi.nlm.nih.gov/pubmed/19164889>
13. Hericks AJ, Bhat A. An overview of alpha-1 antitrypsin deficiency. *Mo Med*. 2007;104(3):255-259. doi: <http://www.ncbi.nlm.nih.gov/pubmed/17619502>
14. Lomas DA. Genetic predisposition to chronic obstructive pulmonary disease: advances in alpha1-antitrypsin deficiency and the serpinopathies. *Clin Med*. 2007;7(5):446-447. doi: <http://www.ncbi.nlm.nih.gov/pubmed/17990707>
15. Mulgrew AT, Taggart CC, McElvaney NG. Alpha-1-antitrypsin deficiency: current concepts. *Lung*. 2007;185(4):191-201. doi: <http://www.ncbi.nlm.nih.gov/pubmed/17562108>
16. Rajangam S, Bijoor A. Metabolic diseases with single gene mode of inheritance - Review. *Perinatology*. 2007;9 (4):190-196.
17. Stolk J, Putter H, Bakker EM, et al. Progression parameters for emphysema: a clinical investigation. *Respir Med*. 2007;101(9):1924-1930. doi: <http://www.ncbi.nlm.nih.gov/pubmed/17644366>
18. Lomas DA, Parker B, Francis lectureship. Antitrypsin deficiency, the serpinopathies, and chronic obstructive pulmonary disease. *Proc Am Thorac Soc*. 2006;3(6):499-501. doi: <http://www.ncbi.nlm.nih.gov/pubmed/16921127>
19. Churg A, Wright JL. Proteases and emphysema. *Curr Opin Pulm Med*. 2005;11(2):153-159. doi: <http://www.ncbi.nlm.nih.gov/pubmed/15699789>
20. Grigorenko EL. The inherent complexities of gene-environment interactions. *J Gerontol B Psychol Sci Soc Sci*. 2005;60 (SPEC. ISS.):53-64. doi: <http://www.ncbi.nlm.nih.gov/pubmed/15863710>

21. Gupta J, Bhadoria DP, Lal MK, et al. Association of the PIM3 allele of the alpha-1-antitrypsin gene with chronic obstructive pulmonary disease. *Clin Biochem.* 2005;38(5):489-491. doi: <http://www.ncbi.nlm.nih.gov/pubmed/15820782>
22. Lomas DA. Molecular mousetraps, alpha1-antitrypsin deficiency and the serpinopathies. *Clin Med.* 2005;5(3):249-257. doi: <http://www.ncbi.nlm.nih.gov/pubmed/16011217>
23. Spurzem JR, Rennard SI. Pathogenesis of COPD. *Semin Respir Crit Care Med.* 2005;26(2):142-153. doi: <http://www.ncbi.nlm.nih.gov/pubmed/16088433>
24. Stoller JK, Aboussouan LS. Alpha1-antitrypsin deficiency. *Lancet.* 2005;365(9478):2225-2236. doi: <http://www.ncbi.nlm.nih.gov/pubmed/15978931>
25. Crowther DC, Belorgey D, Miranda E, Kinghorn KJ, Sharp LK, Lomas DA. Practical genetics: alpha-1-antitrypsin deficiency and the serpinopathies. *Eur J Hum Genet.* 2004;12(3):167-172. doi: <http://www.ncbi.nlm.nih.gov/pubmed/14694355>
26. Lomas DA, Belorgey D, Mallya M, et al. Polymerisation underlies alpha1-antitrypsin deficiency, dementia and other serpinopathies. *Front Biosci.* 2004;9:2873-2891. doi: <http://www.ncbi.nlm.nih.gov/pubmed/15353322>
27. Lomas DA, Parfrey H. Alpha1-antitrypsin deficiency. 4: Molecular pathophysiology. *Thorax.* 2004;59(6):529-535. doi: <http://www.ncbi.nlm.nih.gov/pubmed/15170041>
28. Stoller JK. Alpha1-antitrypsin deficiency. *Thorax.* 2004;59(2):92-93. doi: <http://www.ncbi.nlm.nih.gov/pubmed/14760142>
29. Stoller JK, Snider GL, Brantly M, et al. Standards for the diagnosis and management of individuals with alpha-1 antitrypsin deficiency: Executive summary. *Respir Care.* 2004;48(11):1043-1047.
30. Elzouki AN, Eriksson S. Risk of hepatobiliary disease in adults with severe alpha 1-antitrypsin deficiency (PiZZ): is chronic viral hepatitis B or C an additional risk factor for cirrhosis and hepatocellular carcinoma? *Eur J Gastroenterol Hepatol.* 1996;8(10):989-994. doi: <http://www.ncbi.nlm.nih.gov/pubmed/8930564>
31. King MB, Campbell EJ, Gray BH, Hertz MI. The proteinase-antiproteinase balance in alpha-1-proteinase inhibitor-deficient lung transplant recipients. *Am J Respir Crit Care Med.* 1994;149(4 Pt 1):966-971. doi: <http://www.ncbi.nlm.nih.gov/pubmed/8143063>
32. Guidelines for the approach to the patient with severe hereditary alpha-1-antitrypsin deficiency. American Thoracic Society. *Am Rev Resp Dis.* 1989;140(5):1494-1497. doi: <http://www.ncbi.nlm.nih.gov/pubmed/2683912>

33. Eriksson S. Alpha 1-antitrypsin deficiency and liver cirrhosis in adults. An analysis of 35 Swedish autopsied cases. *Acta Medica Scand.* 1987;221(5):461-467. doi:  
<http://www.ncbi.nlm.nih.gov/pubmed/3496734>
34. Eriksson S, Carlson J, Velez R. Risk of cirrhosis and primary liver cancer in alpha 1-antitrypsin deficiency. *N Engl J Med.* 1986;314(12):736-739. doi:  
<http://www.ncbi.nlm.nih.gov/pubmed/3485248>
